# Supplementary material for: A Single-Component Blue Light-Induced System Based on EL222 in Yarrowia lipolytica
Source: MDPI journal article supplement (doi:10.3390/ijms23116344), 2022-06-06
Supplement: s1 [file s1]

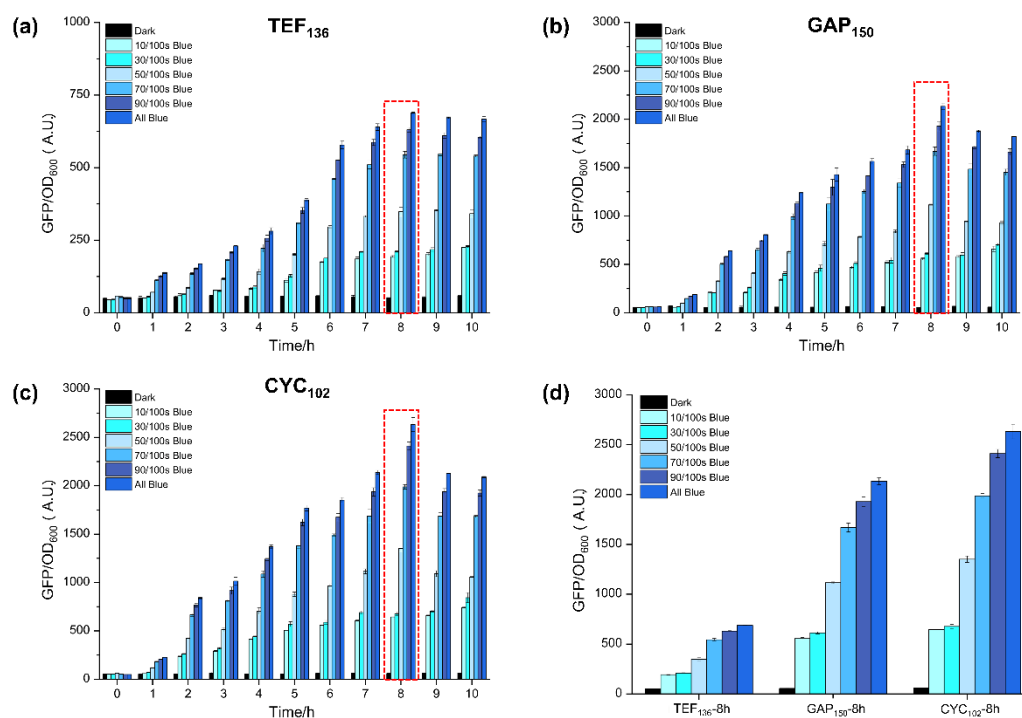

**Figure S1.** Responses of pYLBI systems with different core promoters to the time and dose of blue light irradiation. (a–c) Response effect of pYLBI system with different core promoter CYC<sub>102</sub>, GAP<sub>150</sub> or TEF<sub>136</sub>. (d) Comparison of maximum induction strength of pYLBI system with different core promoters.

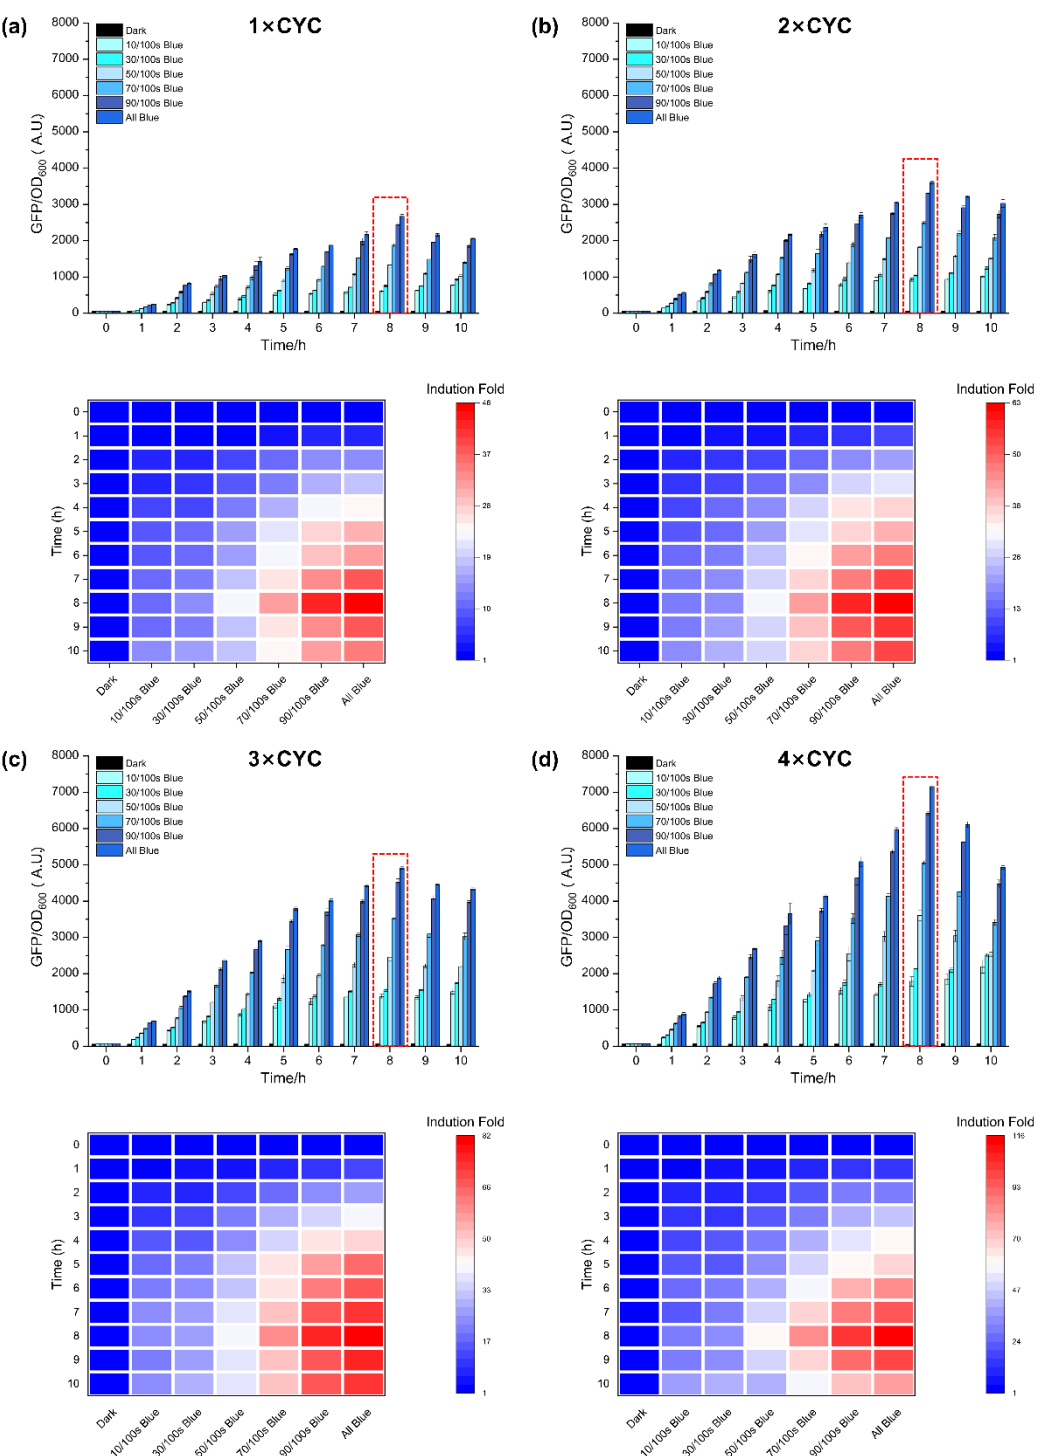

**Figure S2.** Responses of pYLBI systems with different copy numbers of response fragments to time and dose of blue light irradiation. (a-d) Response effect of the pYLBI system containing 1 to 4 copies of the response fragment. The red dotted line outlines the highest induction fold.

**Table S1.** Core/Minimal promoter sequence.

| Core Promoter      | Sequence                                                              |
|--------------------|-----------------------------------------------------------------------|
| minP <sub>64</sub> | AGACACTAGAGGGTATATAATGGAAGCTCGACTTCCAGCTTGG-<br>CAATCCGGTACTGTTGGTAAA |

---

|                     |                                                 |
|---------------------|-------------------------------------------------|
|                     | GTACAATCTTGATCCGGAGCTTTTCTTTTTTTGCCGATTAA-      |
|                     | GAATTAATTCGGTCGAAAAAA-                          |
| TRP <sub>148</sub>  | GAAAAGGAGAGGGCCAAGAGGGAGGGCATTGGTGACTATTGAG     |
|                     | CACGTGAGTATACGTGATTAAGCACACAAAGGCAGCTTGGAGT     |
|                     | CTAGTACACTCTATATTTTTTTATGCCTCGGTAATGAT-         |
|                     | TTTCATTTTTTTTTTTCCAC-                           |
| HIS <sub>3188</sub> | CTAGCGGATGACTCTTTTTTTTTCTTAGCGATTGGCATTATCACAT  |
|                     | AATGAATTATACATTATATAAAGTAATGTGATTTCTTCGAAGAA-   |
|                     | TATACTAAAAAATGAGCAGGCAAGATAAACGAAGGCAAAG        |
|                     | GCATGTGCTCTGTATGTATATAAAACTCTT-                 |
|                     | GTTTTCTTCTTTTCTCTAAA-                           |
| CYC <sub>102</sub>  | TATTCTTTCCTTATACATTAGGACCTTTCAGCATAAATTACTATA   |
|                     | CTTCTA                                          |
|                     | ATAATAGCGGGCGGACGCATGTCATGAGATTATTGGAAACCAC-    |
|                     | CAGAATCGAA-                                     |
| GAP <sub>150</sub>  | TATAAAAGGCGAACACCTTTCCCAATTTTGGTTTCTCCTGACCCA   |
|                     | AAGACTTTAAATTTAATTTATTTGTCCCTATTTCAATCAATT-     |
|                     | GAACAACAT                                       |
|                     | TTGTGGTTGGGACTTTAGCCAAGGGTATAAAAGACCAC-         |
|                     | CGTCCCGAATTAC-                                  |
| TEF <sub>136</sub>  | CTTTCCTCTTCTTTTCTCTCTCTCCTTGTCAACTCACACCCGAAATC |
|                     | GTAAAGCATTTCCTTCTGAGTATAAGAATCATTCAA            |

---
